# Supplementary material for: Hematopoietically-Expressed Homeobox Gene Three Widely-Evaluated Polymorphisms and Risk for Diabetes: A Meta-Analysis
Source: PubMed Central journal article supplement (PMC3499530; doi:10.1371/journal.pone.0049917), 2012-11-15

**Supplementary Figure S1.** Pooled random-effects odds ratios of developing diabetes for rs1111875 (A), rs5015480 (B) and rs7923837 (C) polymorphisms in the *HHEX* gene under allelic model

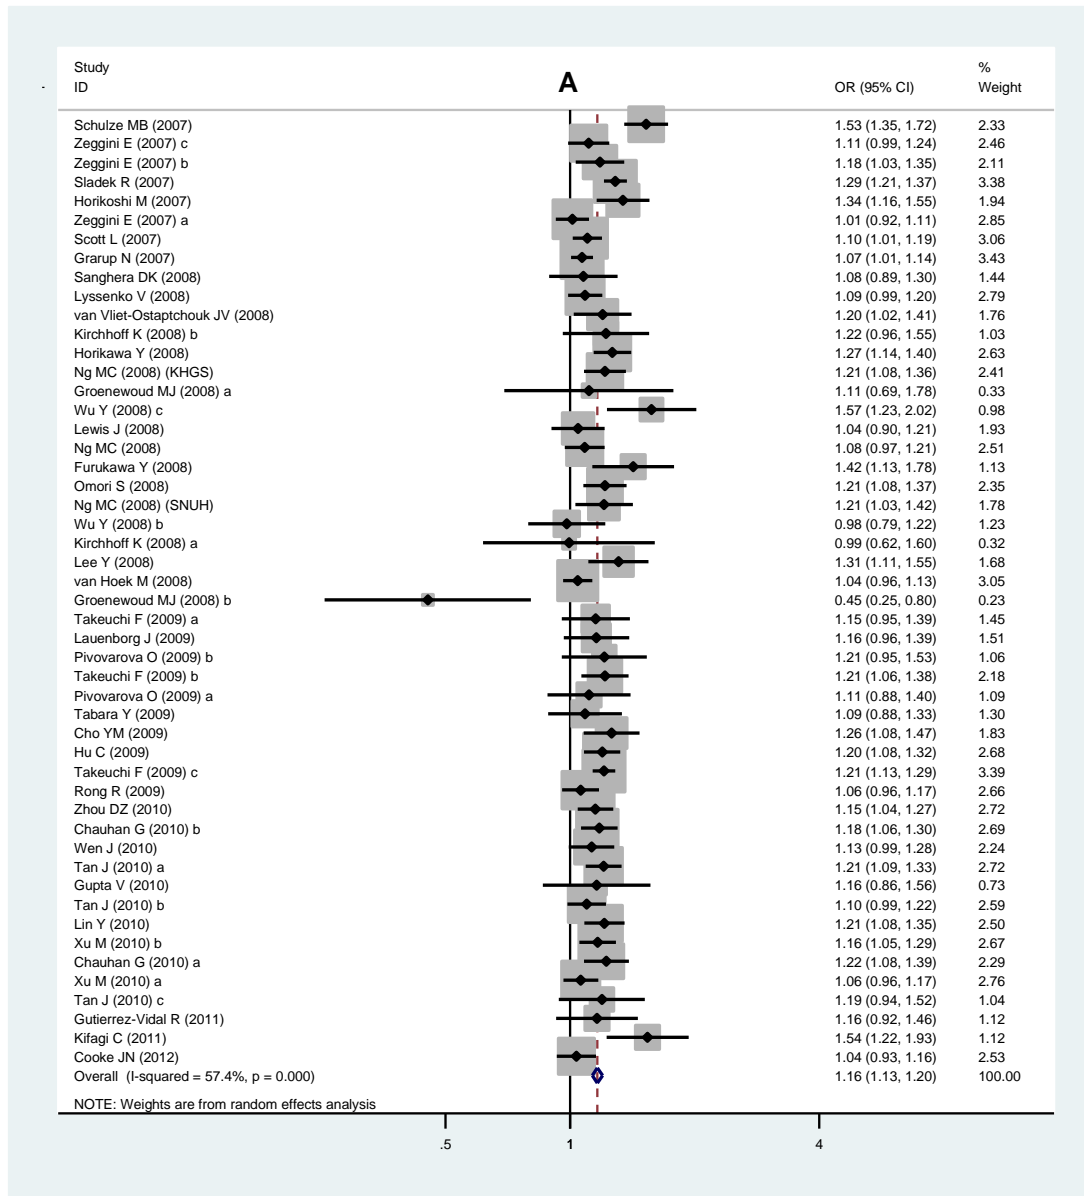

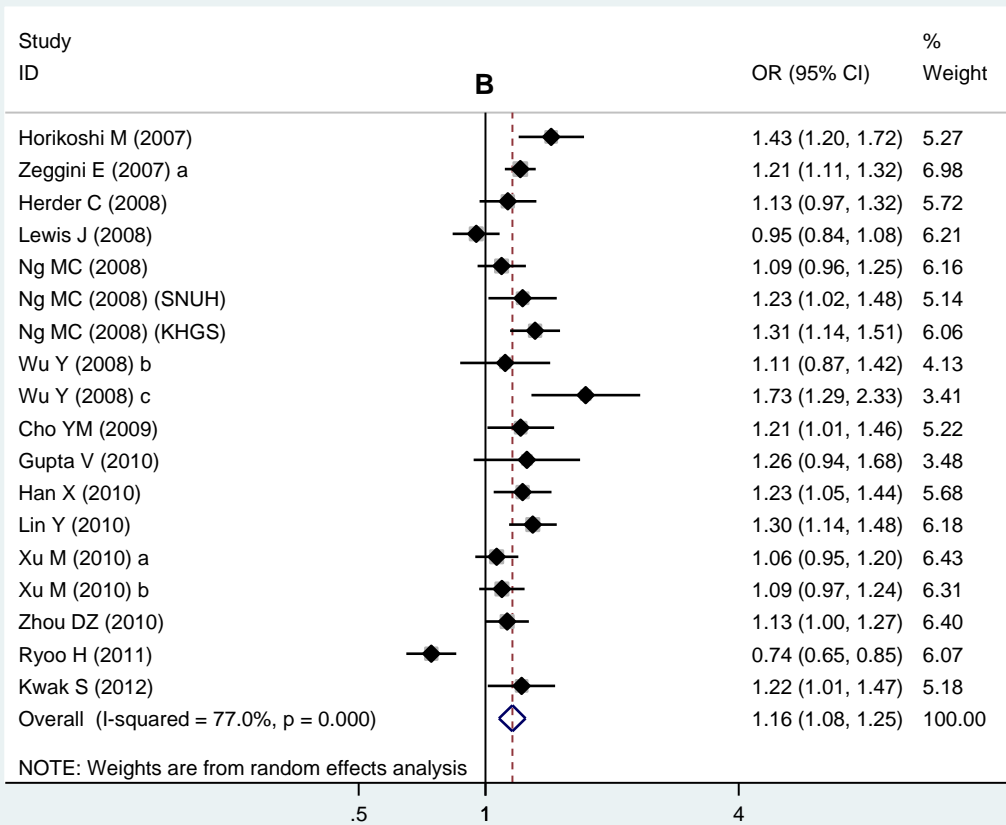

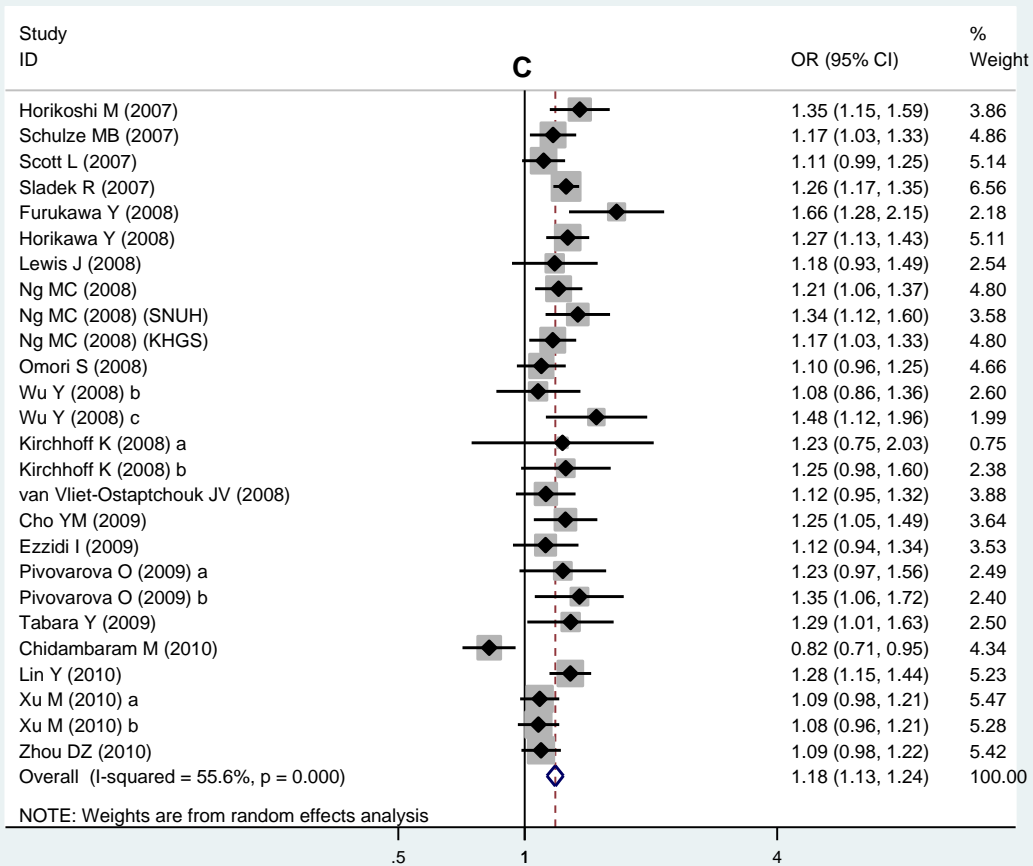

Supplement: pone.0049917.s001.pdf [file pone.0049917.s001.pdf]
